# Supplementary material for: Wavelength-selective photoisomerisation of nitric oxide and nitrite in a rhodium complex
Source: Royal Society of Chemistry journal article supplement (doi:10.1039/c8ce01345d), 2018-01-01
Supplement: c8ce01345d11.pdf [file c8ce01345d11.pdf]

## Supplementary Material

### Wavelength-selective photoisomerisation of nitric oxide and nitrite in a rhodium complex

D. Schaniel, E.-E. Bendeif, T. Woike, H.-C. Böttcher, and S. Pillet

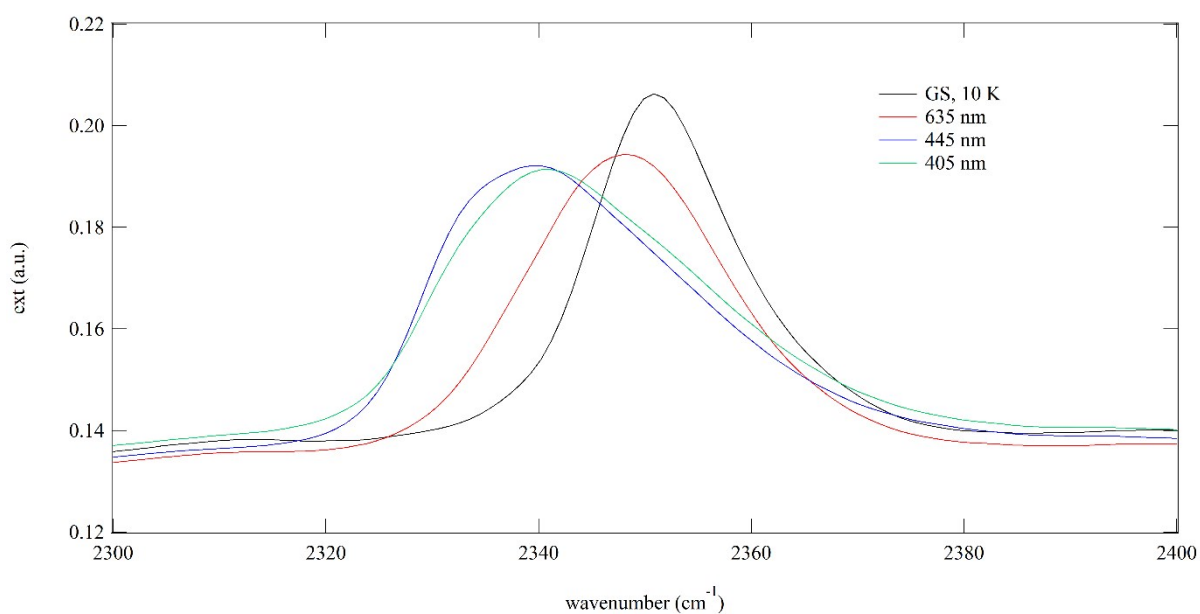

**Fig. S1:** Infrared spectra as a function of irradiation wavelength in the spectral range of the PH vibrational bands.

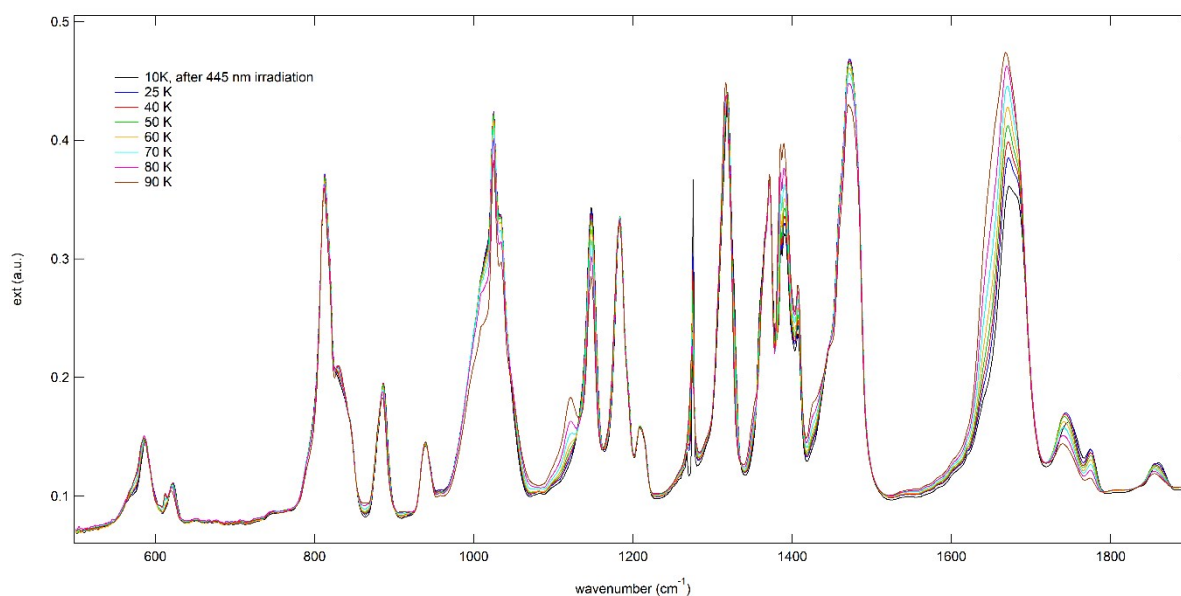

**Fig. S2:** Infrared spectra upon heating after irradiation at 10 K with 445 nm: 10 - 90 K.

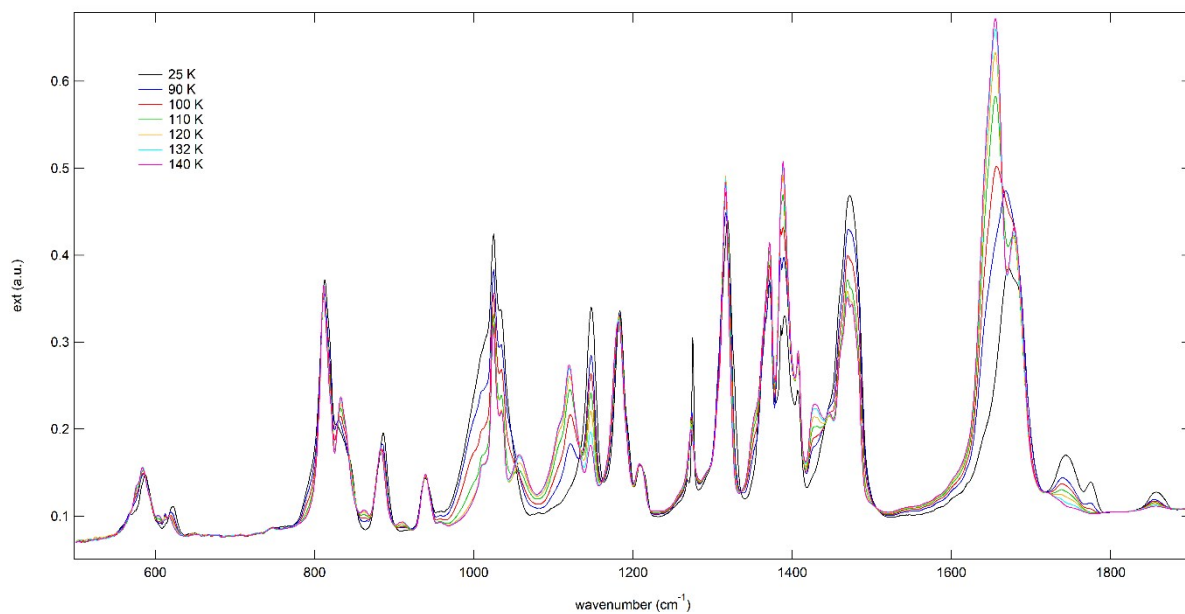

**Fig. S3:** Infrared spectra upon heating after irradiation at 10 K with 445 nm: up to 140 K.

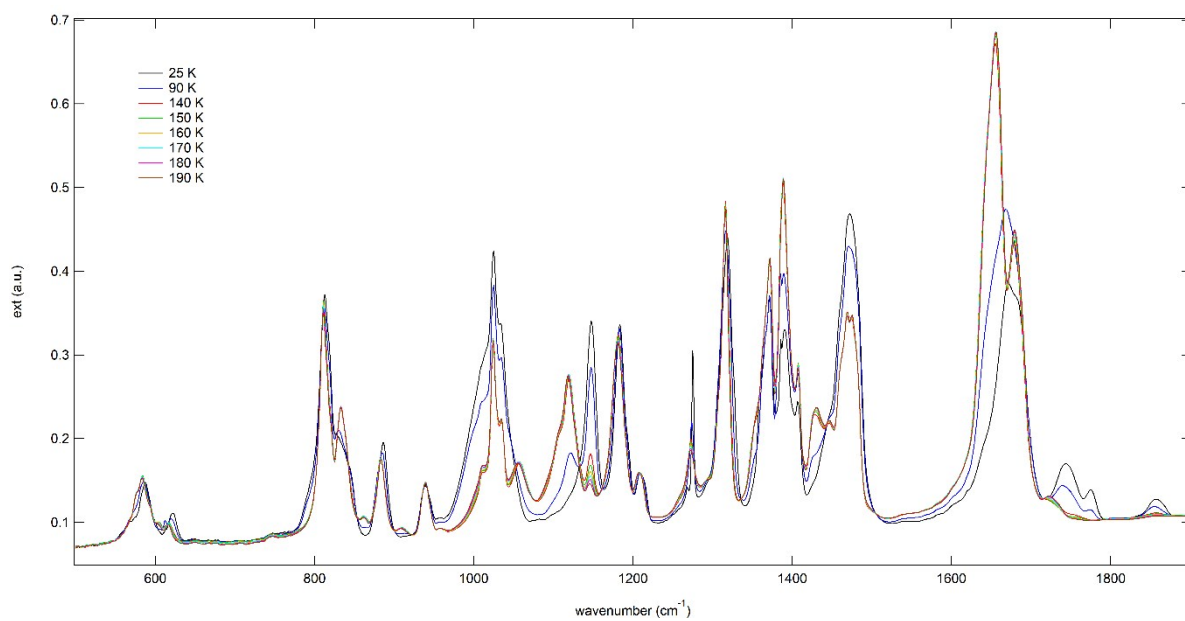

**Fig. S4:** Infrared spectra upon heating after irradiation at 10 K with 445 nm: up to 190 K.

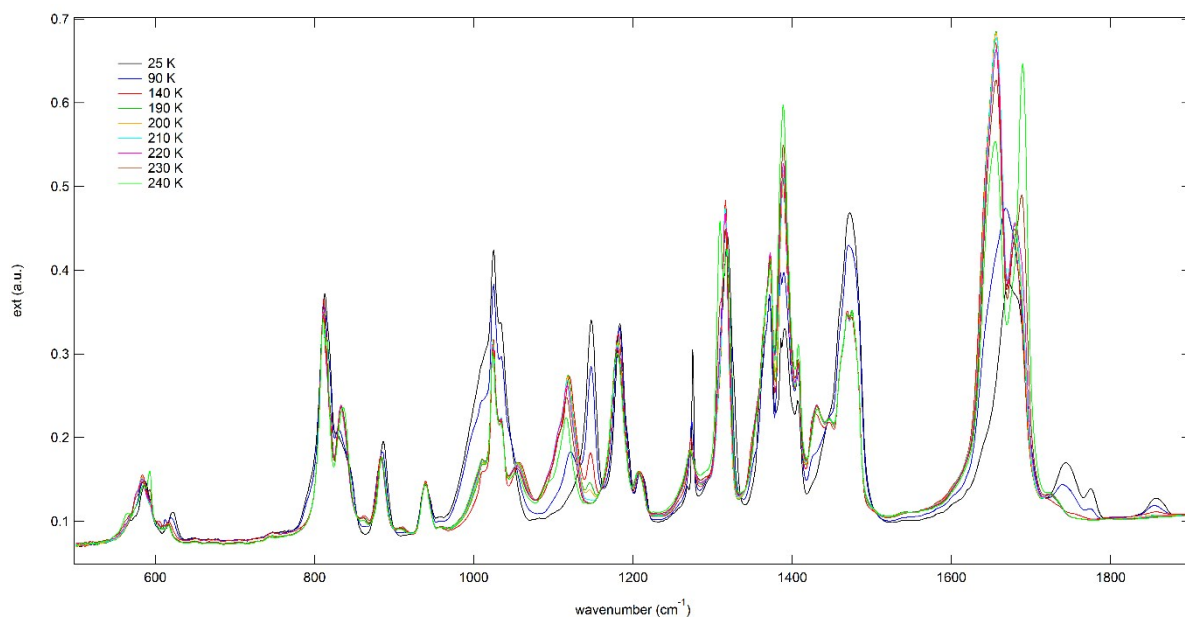

**Fig. S5:** Infrared spectra upon heating after irradiation at 10 K with 445 nm: up to 240 K.

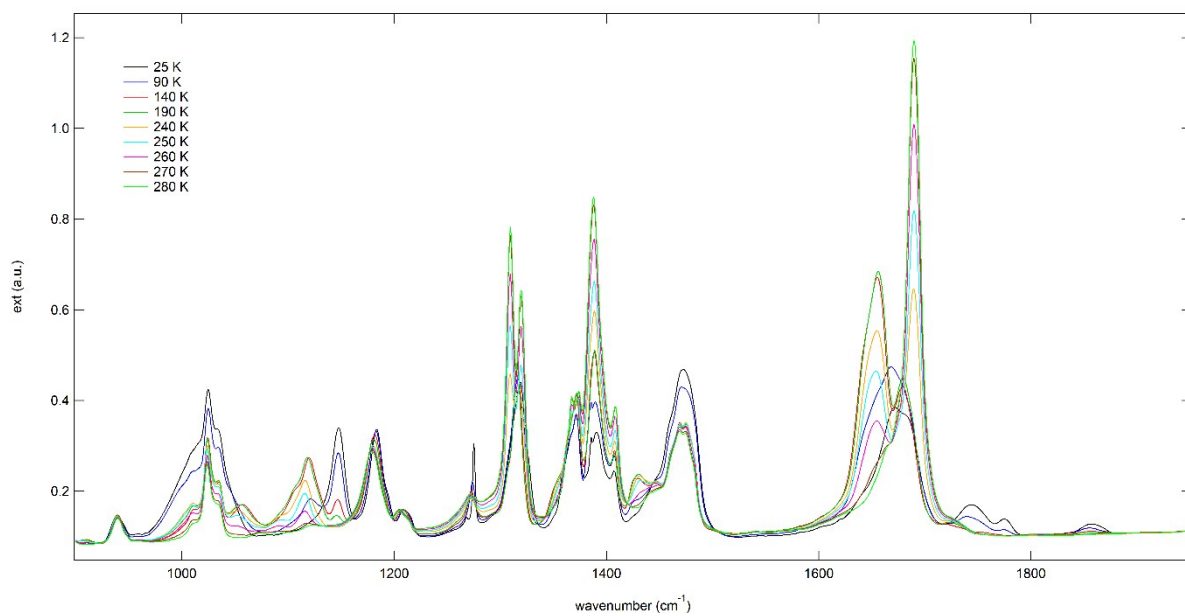

**Fig. S6:** Infrared spectra upon heating after irradiation at 10 K with 445 nm: up to 280 K.

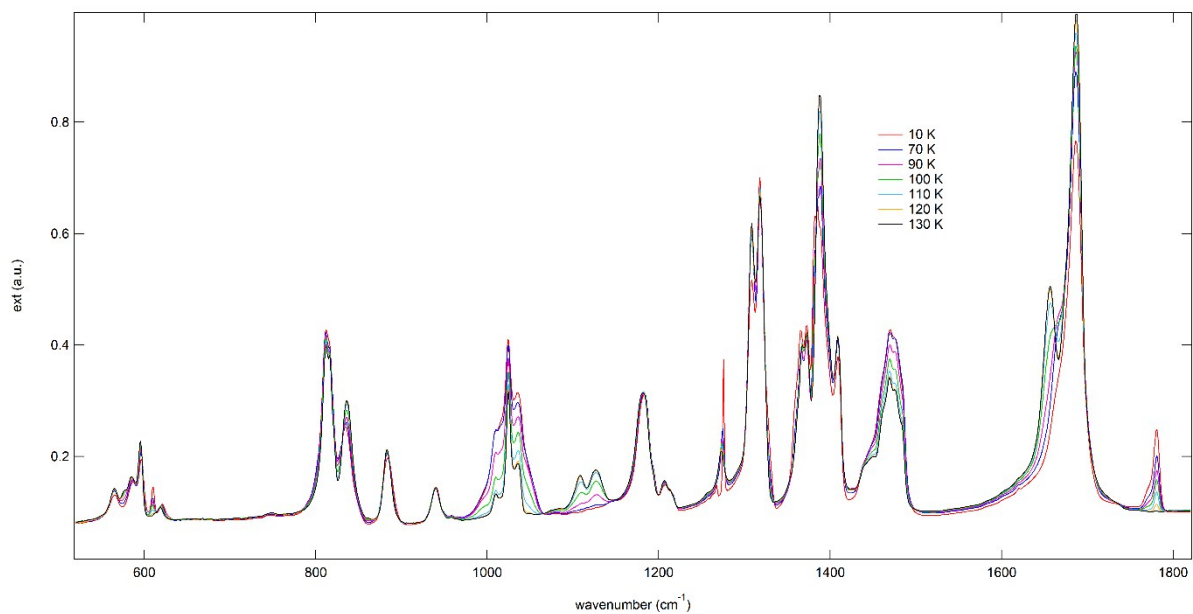

**Fig. S7:** Infrared spectra upon heating after irradiation at 10 K with 635 nm: 10 – 130 K.

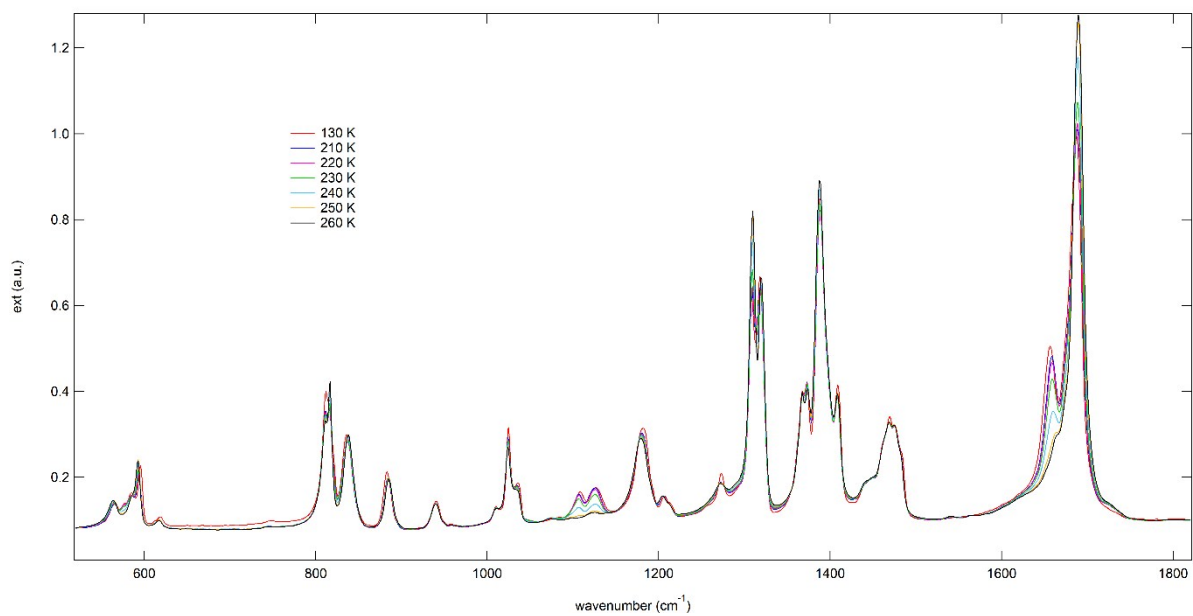

**Fig. S8:** Infrared spectra upon heating after irradiation at 10 K with 635 nm: 130 – 260 K.

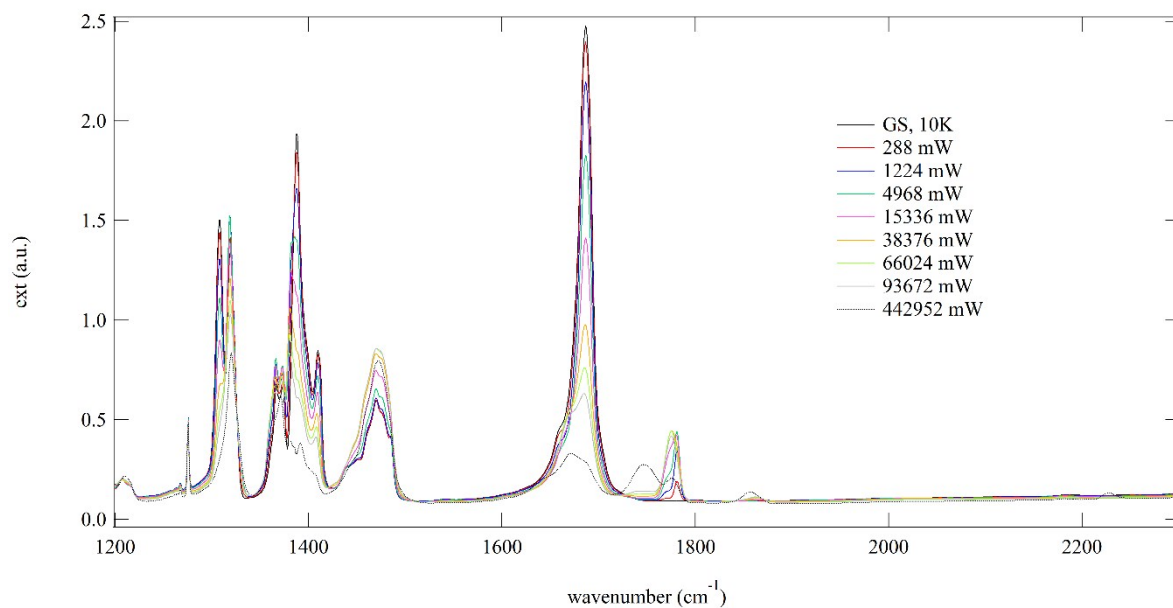

**Fig. S9:** Infrared spectra as a function of irradiation fluence at 10 K with 445 nm. Beyond about 200 mJ/cm<sup>2</sup> the signature of free NO in KBr at 2220 cm<sup>-1</sup> becomes visible.
